# Supplementary material
Source: Elsevier journal article supplement (https://www.sciencedirect.com/science/article/pii/S0001731019303916)
Supplement: mmc1 [file S0001731019303916:mmc1.pdf]

## Anexo

**Tabla 1: ¿Qué herramientas se deben utilizar para evaluar la calidad de vida en pacientes con UCE?**

|      | Indispensable | Se podría considerar | No es imprescindible |
|------|---------------|----------------------|----------------------|
| UAS7 | 90%           | 10%                  | 0%                   |
| AAS  | 0%            | 50%                  | 50%                  |
| UCT  | 30%           | 40%                  | 30%                  |

**Tabla 2: ¿Cuál es el grado de acuerdo o desacuerdo con el algoritmo de tratamiento de las Guías Europeas 2018 para la urticaria? Sobre una escala del 1 al 10 donde 1 es totalmente desacuerdo y 10 totalmente de acuerdo.**

| Porcentaje de expertos | Grado de acuerdo con el algoritmo de las guías europeas<br>(del 1 al 10) |
|------------------------|--------------------------------------------------------------------------|
| 50%                    | 9                                                                        |
| 40%                    | 8                                                                        |
| 10%                    | 7                                                                        |

**Tabla 3: ¿Cuál es el tiempo de espera para cambiar de línea de tratamiento ante la no respuesta al tratamiento actual?**

| Tiempo para cambio | Tratamiento |          |
|--------------------|-------------|----------|
|                    | 1ª línea    | 2ª línea |
| 0-4 semanas        | 70%         | 60%      |
| 4-6 semanas        | 30%         | 40%      |
| 5-8 semanas        | 0           | 0        |

**Tabla 4: ¿Se debe evaluar la actividad, impacto y control de la enfermedad en cada visita?**

| Imprescindible | Se podría considerar | No es imprescindible |
|----------------|----------------------|----------------------|
| 10%            | 10%                  | 80%                  |
